# Supplementary material for: Habitat sharing and interspecies interactions in caves used by bats in the Republic of Congo
Source: PeerJ journal article supplement (doi:10.7717/peerj.18145), 2025-01-09
Supplement: Appendice_27_juil.pdf [file Appendice_27_juil.pdf]

- 1 **Appendix S1:** General diagram of the configuration of the Mont Belo cave, the location of the camera trap and the bat roosting sites. Silhouette
- 2 image source credit: Microsoft. Photograph image source credit: ML.

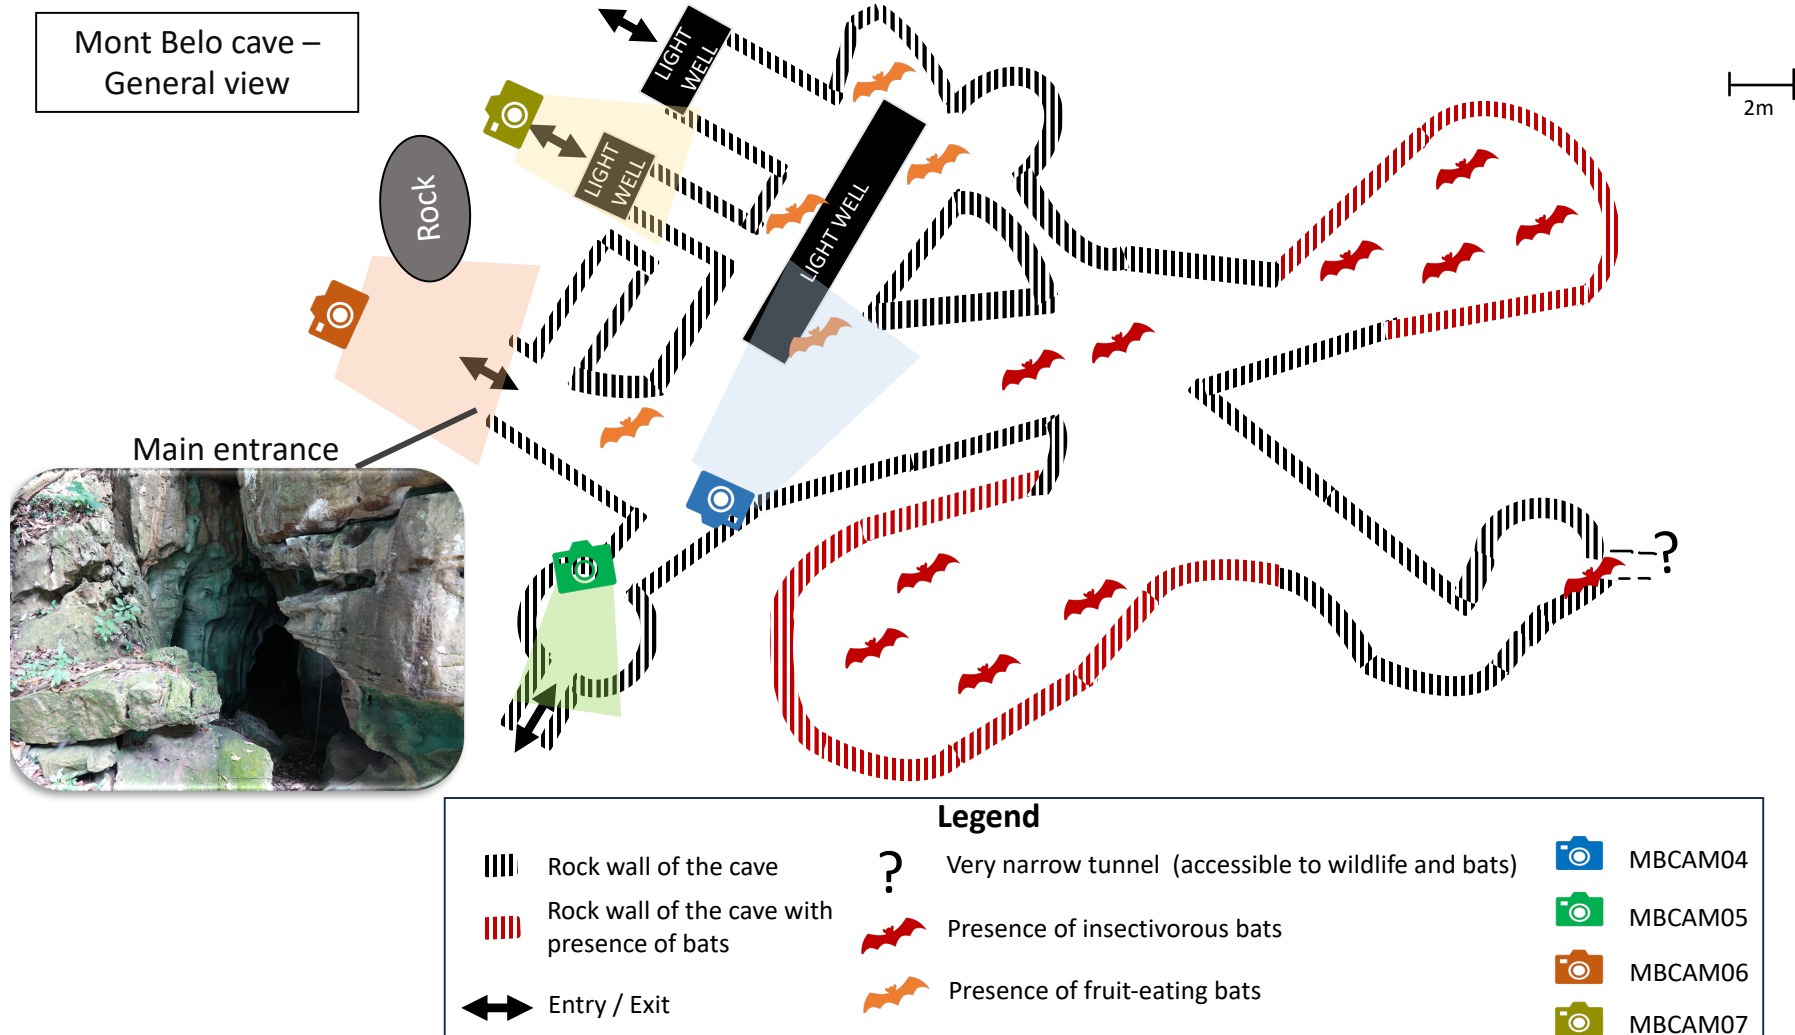

- 4 **Appendix S2:** General diagram of the configuration of the Boundou cave, the location of the camera trap and the bat roosting sites. Silhouette
- 5 image source credit: Microsoft. Photograph image source credit: ML.

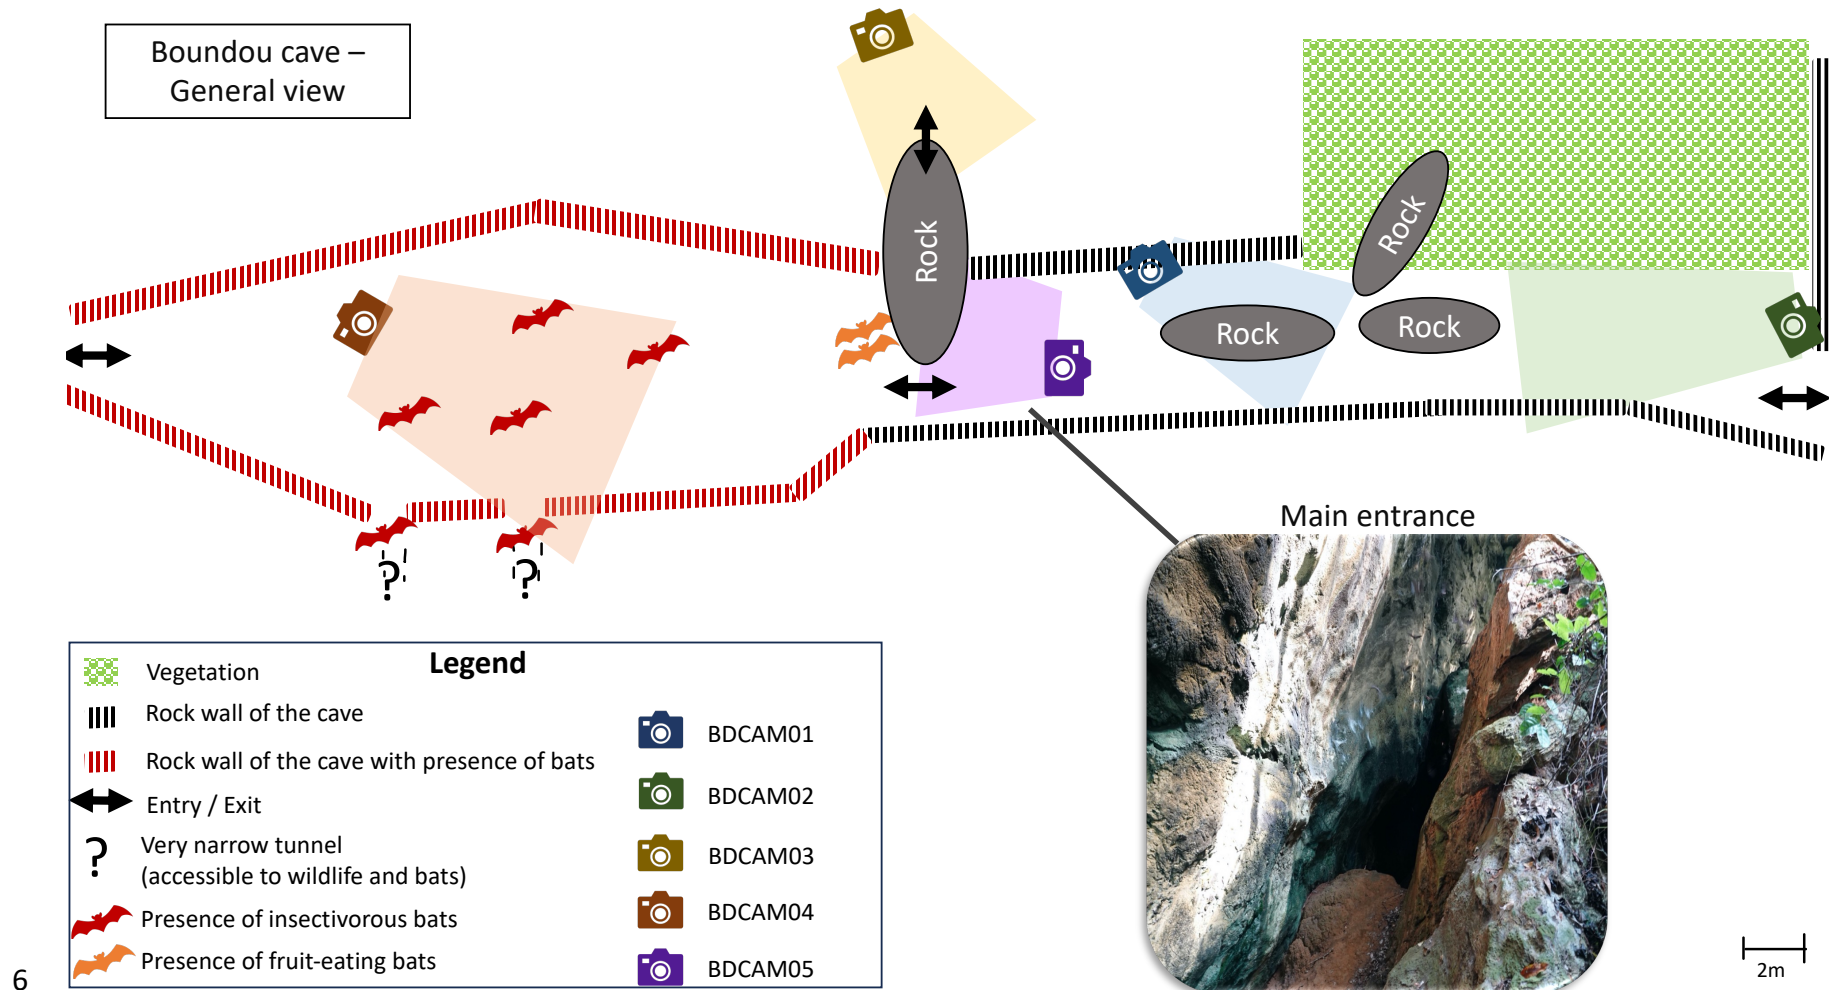

7 **Appendix S3:** Details of rodent capture sessions in the two caves in this study.

8

9 During these capture sessions, we used two types of trap to capture rodents (Tomahawk and  
10 Havahart). In total, 16 traps were set in Mont Belo (nine Tomahawk and seven Havahart), due  
11 to the high detection of rodents in this cave, and six traps in the Boundou cave (three  
12 Tomahawk and three Havahart).

13 The traps were set each time on two consecutive nights by placing several types of bait  
14 (groundnuts, sardines, corn, etc.) inside the traps. The traps were baited in the early morning  
15 each time and checked the next morning.

16 We caught two small rodents in the Boundou cave and none in the Boundou cave. Preliminary  
17 identification identifies this species as *Prionomys batesi*, although genetic analysis is underway  
18 to confirm this information.

19 **Appendix S4:** Raw data of detection

20 <https://dataverse.cirad.fr/privateurl.xhtml?token=a3f476f6-1bfa-4a0b-b88b-46f90909b262>

21 **Appendix S5:** Number of days the camera traps were in operation during the study. A total of nine cameras for all sites, with five for Boundou  
22 cave (including one inside the cave) and four for Mont Belo cave (including 2 inside the cave).

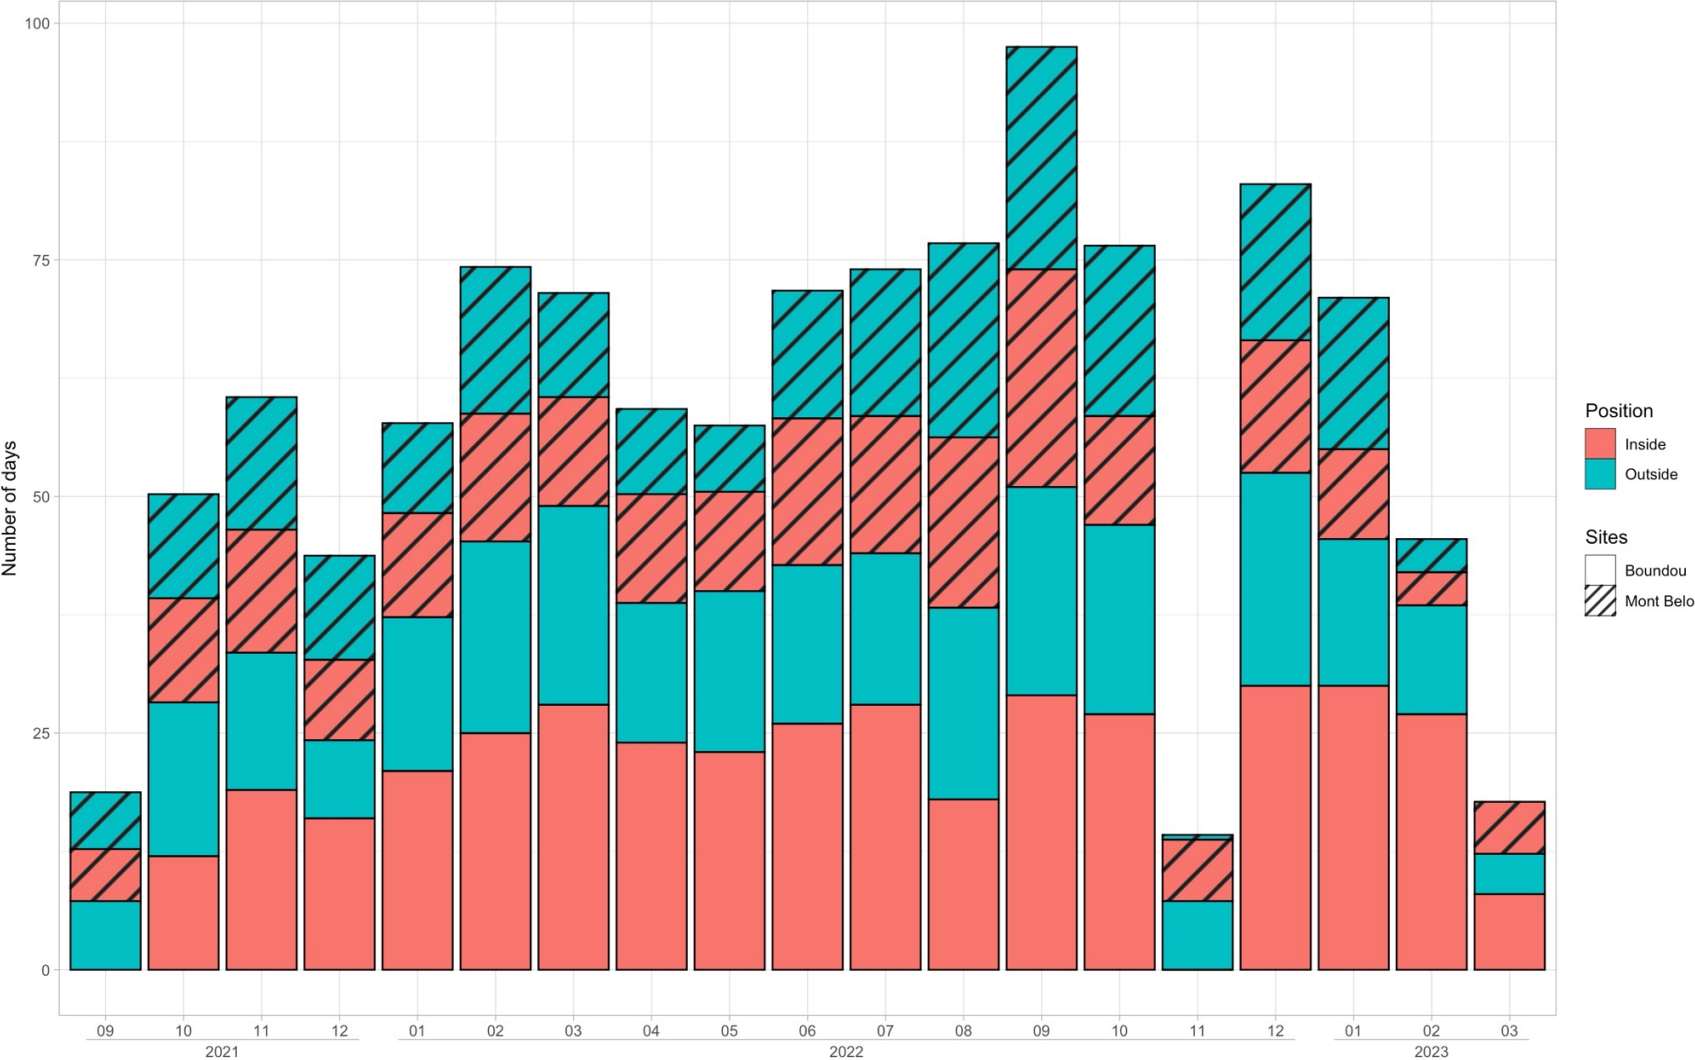

24 **Appendix S6:** Number of vertebrate species per camera days multiplied by 100 according to study sites (Boundou and Mont Belo cave) and  
 25 position of camera (inside or outside). This figure shows all the detections.

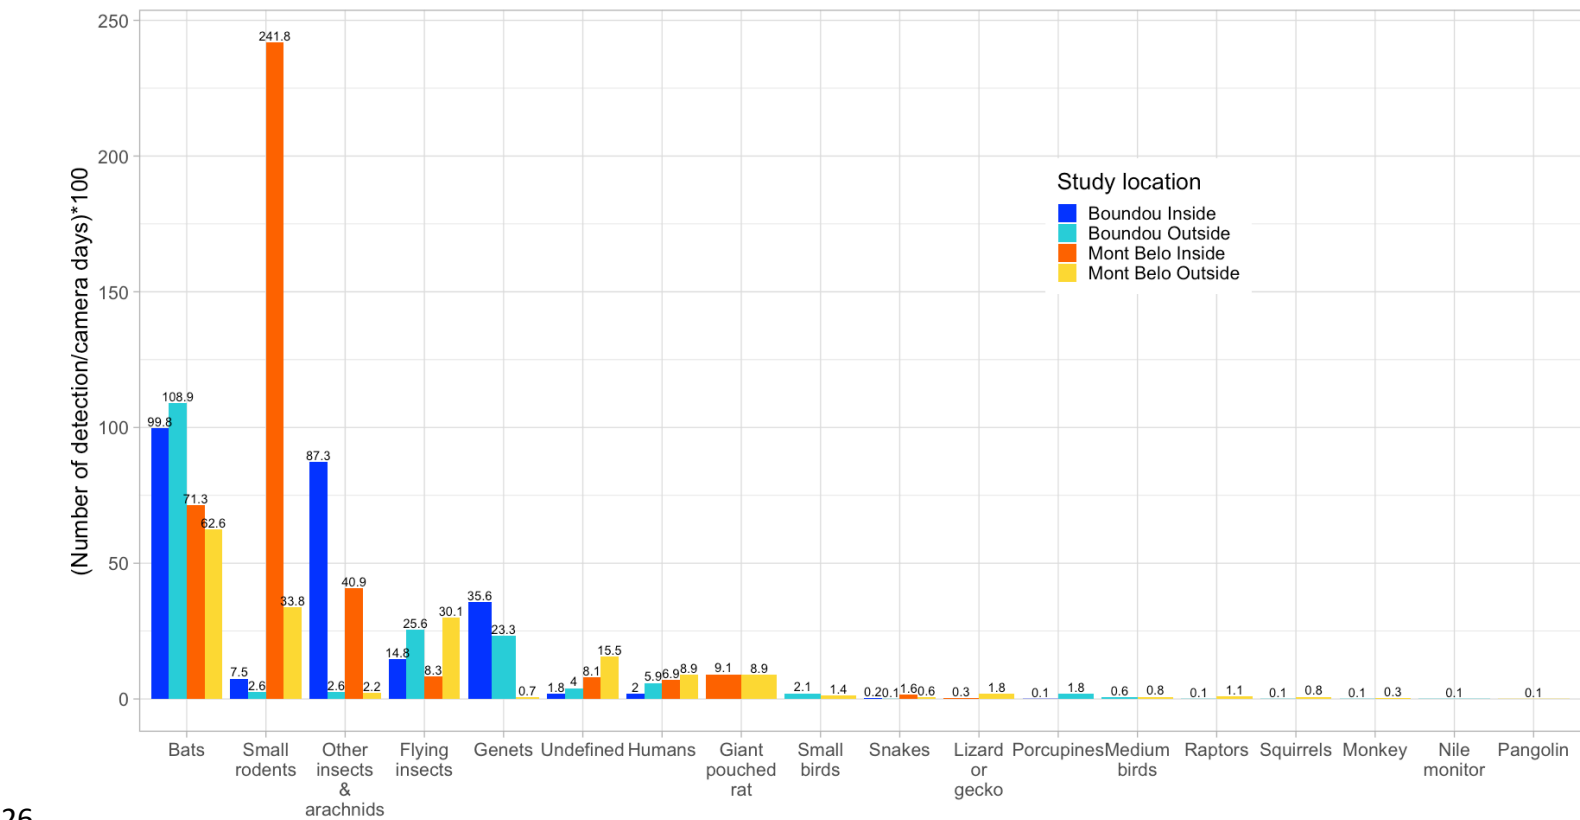

26

27

28 **Appendix S7:** List of all detected species and scientific name if available (N = 11,581

29 detections for a total of 11,767 animals)

| Common names              | Scientific Name            | Group             | Study site and posi- | Number of detection | Number of animals |
|---------------------------|----------------------------|-------------------|----------------------|---------------------|-------------------|
| African harrier hawk      | <i>Polyboroides typus</i>  | Raptors           | Boundou Outside      | 1                   | 1                 |
| African wood owl          | <i>Strix woodfordii</i>    | Raptors           | Mont Belo Outside    | 10                  | 10                |
| Ants                      | NA                         | Other insects     | Mont Belo Outside    | 1                   | 1                 |
| Bats                      | NA                         | Bats              | Boundou Inside       | 1562                | 1562              |
| Bats                      | NA                         | Bats              | Boundou Outside      | 1705                | 1705              |
| Bats                      | NA                         | Bats              | Mont Belo Inside     | 626                 | 626               |
| Bats                      | NA                         | Bats              | Mont Belo Outside    | 550                 | 550               |
| Large rodents             | <i>Cricetomys emini</i>    | Giant pouched rat | Mont Belo Inside     | 79                  | 79                |
| Large rodents             | <i>Cricetomys emini</i>    | Giant pouched rat | Mont Belo Outside    | 78                  | 78                |
| Large rodents             | NA                         | Large rodents     | Mont Belo Inside     | 1                   | 1                 |
| Black-bellied seedcracker | <i>Pyrenestes ostrinus</i> | Small birds       | Mont Belo Outside    | 1                   | 1                 |
| Butterflies               | NA                         | Flying insects    | Boundou Outside      | 10                  | 10                |
| Butterflies               | NA                         | Flying insects    | Mont Belo Outside    | 13                  | 13                |
| Cave beetles              | NA                         | Other insects     | Boundou Inside       | 1334                | 1334              |
| Cave beetles              | NA                         | Other insects     | Boundou Outside      | 15                  | 15                |
| Cave beetles              | NA                         | Other insects     | Mont Belo Inside     | 79                  | 79                |
| Genets                    | <i>Genetta maculata</i>    | Genets            | Boundou Inside       | 557                 | 561               |
| Genets                    | <i>Genetta maculata</i>    | Genets            | Boundou Outside      | 364                 | 377               |
| Genets                    | <i>Genetta servalina</i>   | Genets            | Mont Belo Outside    | 6                   | 6                 |
| Collared sunbird          | <i>Hedydipna collaris</i>  | Small birds       | Mont Belo Outside    | 2                   | 2                 |
| Crickets                  | NA                         | Other insects     | Boundou Inside       | 15                  | 15                |
| Crickets                  | NA                         | Other insects     | Boundou Outside      | 10                  | 10                |
| Crickets                  | NA                         | Other insects     | Mont Belo Inside     | 253                 | 253               |
| Crickets                  | NA                         | Other insects     | Mont Belo Outside    | 4                   | 4                 |
| Dove and pigeon           | NA                         | Medium birds      | Boundou Outside      | 10                  | 14                |
| Dove and pigeon           | NA                         | Medium birds      | Mont Belo Outside    | 2                   | 2                 |
| Flies                     | NA                         | Flying insects    | Boundou Inside       | 232                 | 232               |
| Flies                     | NA                         | Flying insects    | Boundou Outside      | 388                 | 388               |
| Flies                     | NA                         | Flying insects    | Mont Belo Inside     | 73                  | 73                |
| Flies                     | NA                         | Flying insects    | Mont Belo Outside    | 251                 | 251               |
| Giant pangolin            | <i>Smutsia gigantea</i>    | Pangolin          | Mont Belo Outside    | 1                   | 1                 |
| Humans                    | NA                         | Humans            | Boundou Inside       | 31                  | 40                |
| Humans                    | NA                         | Humans            | Boundou Outside      | 93                  | 98                |
| Humans                    | NA                         | Humans            | Mont Belo Inside     | 61                  | 80                |
| Humans                    | NA                         | Humans            | Mont Belo Outside    | 78                  | 114               |

| Common names                | Scientific Name          | Group           | Study site and posi- | Number of detection | Number of animals |
|-----------------------------|--------------------------|-----------------|----------------------|---------------------|-------------------|
| Icterine greenbul           | Phyllastrephus icterinus | Medium birds    | Mont Belo Outside    | 1                   | 1                 |
| Lesser striped swallow      | Cercropsis abyssinica    | Small birds     | Mont Belo Outside    | 8                   | 8                 |
| Lizard or gecko             | NA                       | Lizard or gecko | Mont Belo Inside     | 3                   | 3                 |
| Lizard or gecko             | NA                       | Lizard or gecko | Mont Belo Outside    | 16                  | 16                |
| Monkey                      | Chlorocebus cynosuros    | Monkey          | Boundou Outside      | 1                   | 1                 |
| Monkey                      | Chlorocebus cynosuros    | Monkey          | Mont Belo Outside    | 3                   | 3                 |
| NI                          | NA                       | Not Identified  | Boundou Inside       | 28                  | 29                |
| NI                          | NA                       | Not Identified  | Boundou Outside      | 62                  | 71                |
| NI                          | NA                       | Not Identified  | Mont Belo Inside     | 71                  | 78                |
| NI                          | NA                       | Not Identified  | Mont Belo Outside    | 136                 | 152               |
| Nile monitor                | Varanus niloticus        | Nile monitor    | Boundou Outside      | 2                   | 2                 |
| Palm thrushes               | NA                       | Medium birds    | Mont Belo Outside    | 2                   | 2                 |
| Passerine birds             | Malimbus sp              | Small birds     | Boundou Outside      | 1                   | 1                 |
| Pied crow                   | Corvus albus             | Medium birds    | Mont Belo Outside    | 1                   | 1                 |
| Porcupines                  | Atherurus africanus      | Porcupines      | Boundou Inside       | 2                   | 2                 |
| Porcupines                  | Atherurus africanus      | Porcupines      | Boundou Outside      | 28                  | 29                |
| Scaly spurfowl              | Pternistis squamatus     | Medium birds    | Mont Belo Outside    | 1                   | 1                 |
| Small rodents               | NA                       | Small rodents   | Boundou Inside       | 117                 | 119               |
| Small rodents               | NA                       | Small rodents   | Boundou Outside      | 39                  | 39                |
| Small rodents               | NA                       | Small rodents   | Mont Belo Inside     | 2123                | 2170              |
| Small rodents               | NA                       | Small rodents   | Mont Belo Outside    | 297                 | 310               |
| Snake                       | NA                       | Snakes          | Boundou Inside       | 3                   | 3                 |
| Snake                       | NA                       | Snakes          | Boundou Outside      | 1                   | 1                 |
| Snake                       | NA                       | Snakes          | Mont Belo Inside     | 14                  | 14                |
| Snake                       | NA                       | Snakes          | Mont Belo Outside    | 5                   | 5                 |
| Snowy-crowned robin-chat    | Cossypha niveicapilla    | Small birds     | Boundou Outside      | 32                  | 32                |
| Snowy-crowned robin-chat    | Cossypha niveicapilla    | Small birds     | Mont Belo Outside    | 1                   | 1                 |
| Spider                      | NA                       | Other insects   | Boundou Inside       | 18                  | 18                |
| Spider                      | NA                       | Other insects   | Boundou Outside      | 15                  | 15                |
| Spider                      | NA                       | Other insects   | Mont Belo Inside     | 27                  | 27                |
| Spider                      | NA                       | Other insects   | Mont Belo Outside    | 14                  | 14                |
| Squirrels                   | NA                       | Squirrels       | Boundou Outside      | 1                   | 1                 |
| Squirrels                   | NA                       | Squirrels       | Mont Belo Outside    | 7                   | 7                 |
| Typical striped grass mouse | Lemniscomys striatus     | Small rodents   | Boundou Outside      | 2                   | 2                 |
| Wasp                        | NA                       | Flying insects  | Boundou Outside      | 3                   | 3                 |

31 **Appendix S8:** Facebook of species with camera traps taken during the nineteen months of study. (A) *Genetta servalina*, (B) *Genetta maculata*,  
32 (C) *Atherurus africanus*, (D) *Chlorocebus cynosuroides*, (E) small rodents, (F) *Cricetomys emini*, (G) *Strix woodfordii*, (H) *Coscyphus niveicapilla* and  
33 (I) *Varanus niloticus*. Photograph image source credit: ML.

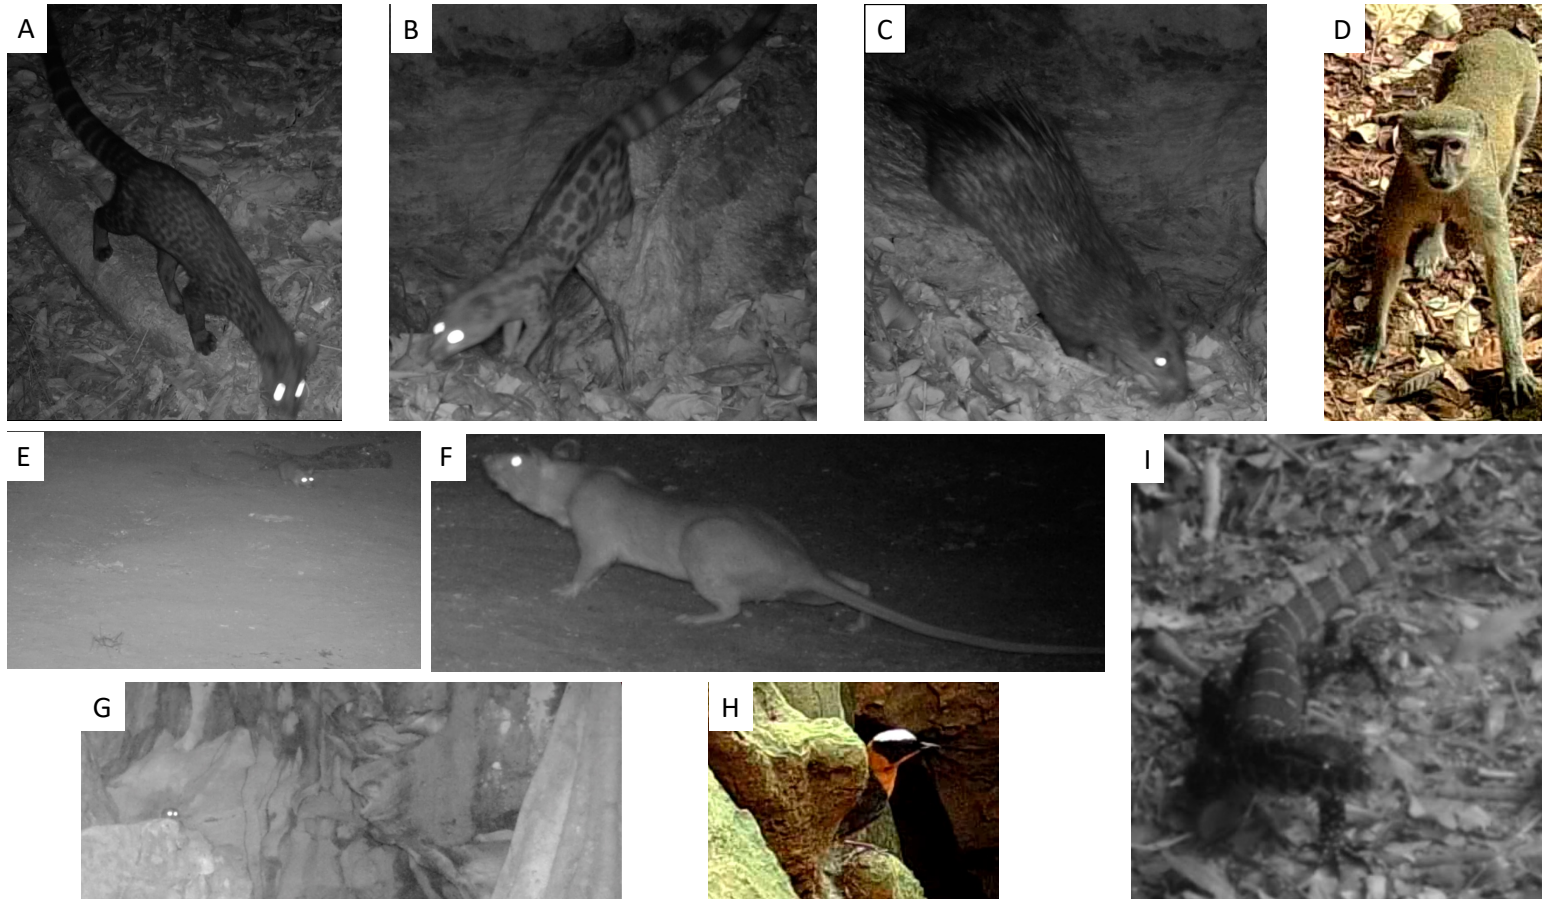

34

35 **Appendix S9:** Picture of one individual of Giant pouched rat (*Cricetomys emini*) with swollen jowls. Photograph image source credit: ML.

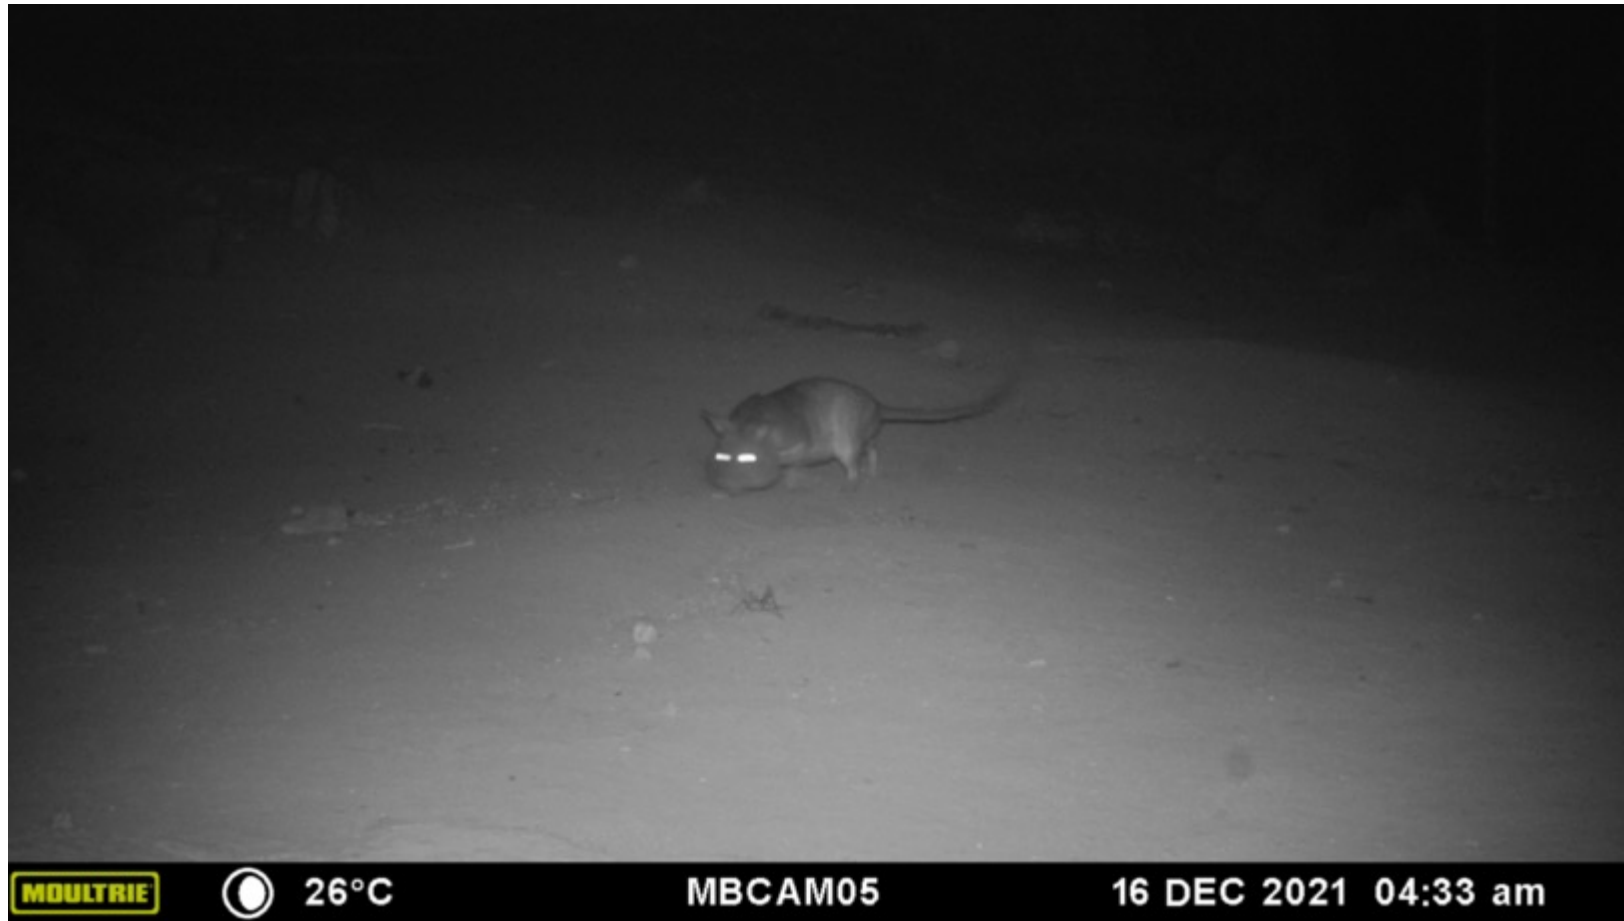

**Appendix S10:** Daily activity pattern of species according to activities outside or inside Mont Belo or Boundou cave. (A, B) overlap activities inside and outside Mont Belo cave for small rodents vs bats, (C, D) overlap activities inside and outside Boundou cave for genets vs bats, (E, F) overlap activities inside and outside Boundou cave for flying insects vs bats, and (G, H) overlap activities inside and outside Mont belo cave for other insects & arachnids vs bats.

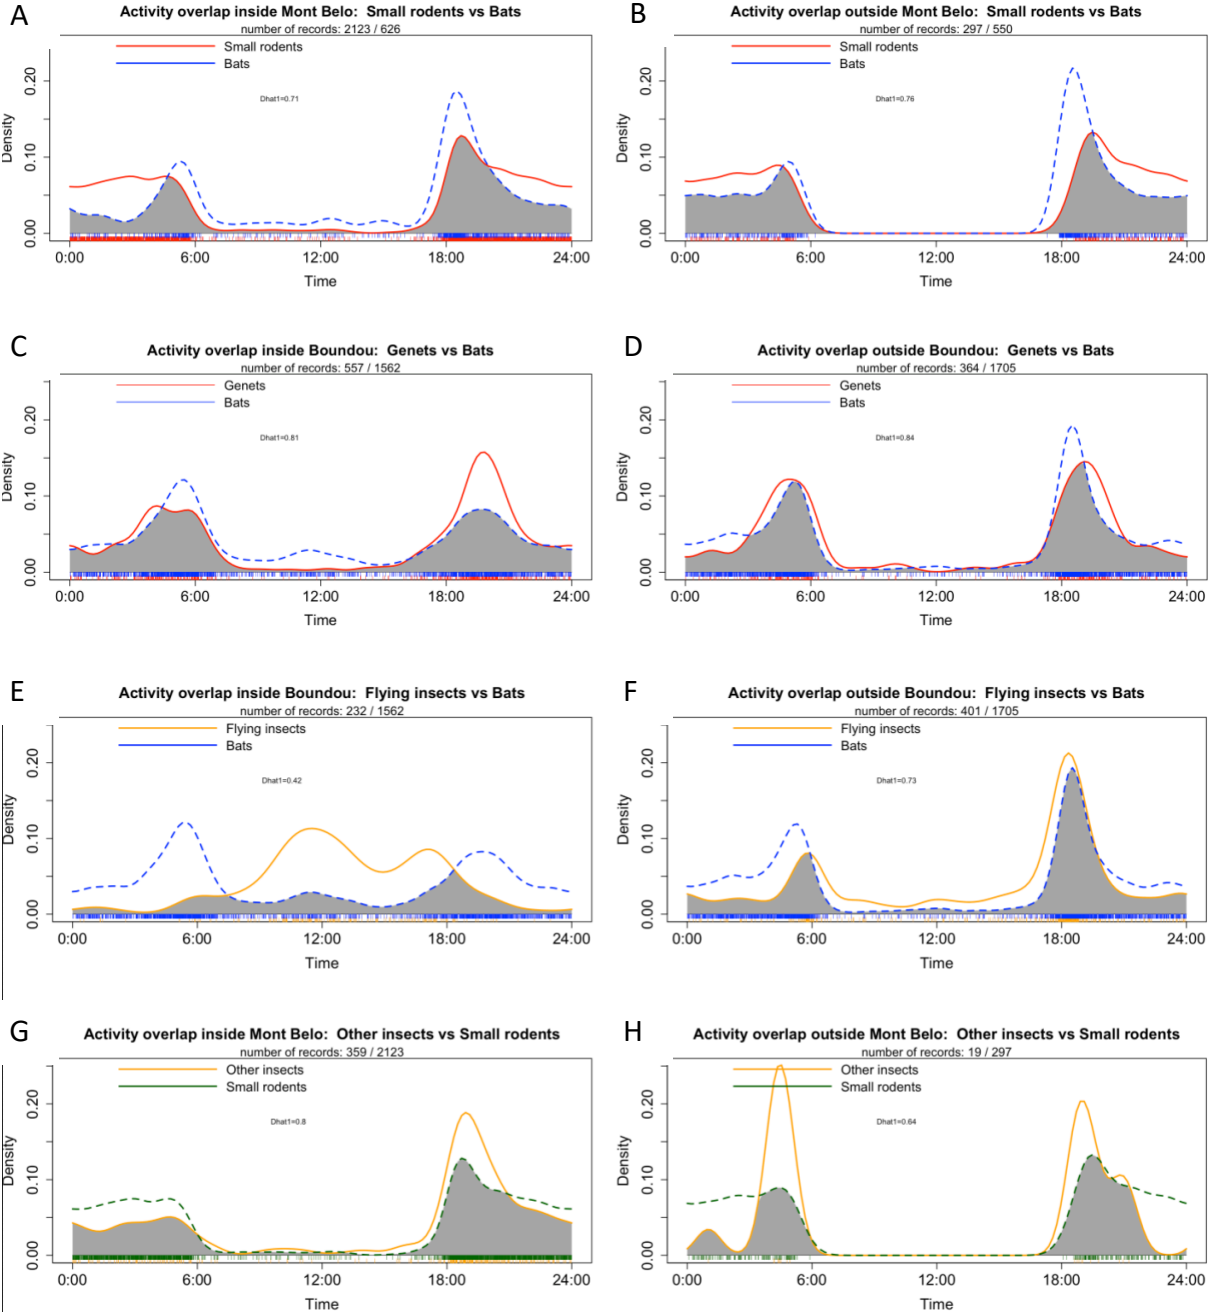

45 **Appendix S11:** Daily activity pattern of species according to activities outside or inside Mont  
 46 Belo cave. (A, B) overlap activities outside and inside Mont Belo cave for giant pouched rat  
 47 vs bats (C, D) overlap activities outside and inside Mont Belo cave for flying insects vs small  
 48 rodents and.

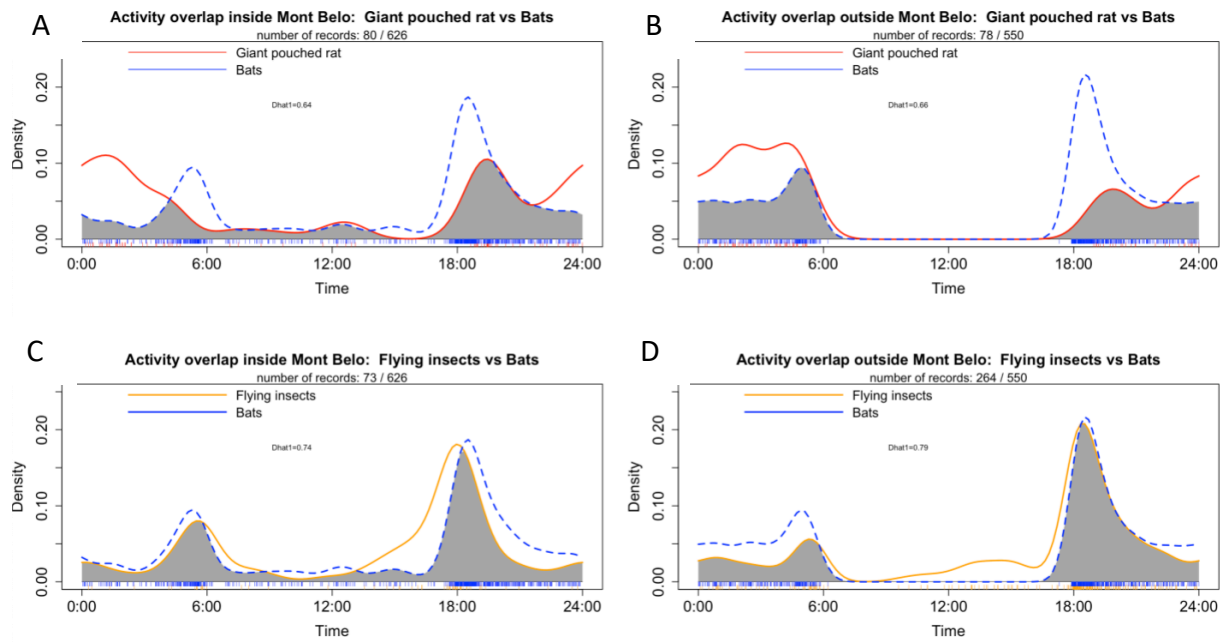

49
